# Supplementary material for: Profiling of carbohydrate mixtures at unprecedented resolution using high-precision1H-13C chemical shift measurements and a reference library
Source: Royal Society of Chemistry journal article supplement (doi:10.1039/c3an01922e), 2013-11-11

## Supporting Information

Profiling of carbohydrate mixtures at unprecedented resolution using high-precision  
 $^1\text{H}$ - $^{13}\text{C}$  chemical shift measurements and a reference library

Bent Ole Petersen, Ole Hindsgaul and Sebastian Meier<sup>a</sup>

Carlsberg Laboratory, Gamle Carlsberg Vej 10, 1799 Copenhagen V, Denmark.  
E-mail: [sebastian.meier@carlsberglab.dk](mailto:sebastian.meier@carlsberglab.dk); Tel: +45-3327-5301; Fax: +45-3327-4708.

**Table S1: Systematic names of oligosaccharides in the reference library of Table 1 and enantiomeric forms of monosaccharides that were used for chemical shift measurements**

|                                                                                                      |                                                                                                                                                                                                      |
|------------------------------------------------------------------------------------------------------|------------------------------------------------------------------------------------------------------------------------------------------------------------------------------------------------------|
| glucose (Glc)                                                                                        | D-glucose                                                                                                                                                                                            |
| 2-deoxyglucose (2DG)                                                                                 | 2-deoxy-D-glucose                                                                                                                                                                                    |
| 3-deoxyglucose (3DG)                                                                                 | 3-deoxy-D-glucose                                                                                                                                                                                    |
| 6 <sup>3</sup> - $\alpha$ -glucosyl-maltotriose<br>(6 <sup>3</sup> GM <sub>3</sub> )                 | $\alpha$ -D-glucopyranosyl-(1-6)- $\alpha$ -D-<br>glucopyranosyl-(1-4)- $\alpha$ -D-<br>glucopyranosyl-(1-4)-D-glucose                                                                               |
| 6 <sup>3</sup> - $\alpha$ -maltosyl-maltotriose<br>(6 <sup>3</sup> M <sub>2</sub> M <sub>3</sub> )   | $\alpha$ -D-glucopyranosyl-(1-4)- $\alpha$ -D-<br>glucopyranosyl-(1-6)- $\alpha$ -D-<br>glucopyranosyl-(1-4)- $\alpha$ -D-<br>glucopyranosyl-(1-4)-D-glucose                                         |
| 6 <sup>3</sup> - $\alpha$ -maltosyl-maltotetraose<br>(6 <sup>3</sup> M <sub>2</sub> M <sub>4</sub> ) | $\alpha$ -D-glucopyranosyl-(1-4)- $\alpha$ -D-<br>glucopyranosyl-(1-6)-[ $\alpha$ -D-<br>glucopyranosyl-(1-4)]- $\alpha$ -D-<br>glucopyranosyl-(1-4)- $\alpha$ -D-<br>glucopyranosyl-(1-4)-D-glucose |
| allose (All)                                                                                         | L-allose                                                                                                                                                                                             |
| altrose (Alt)                                                                                        | D-altrose                                                                                                                                                                                            |
| amylopectin (Amy)                                                                                    | -                                                                                                                                                                                                    |
| arabinose (Ara)                                                                                      | L-arabinose                                                                                                                                                                                          |
| cellobiose (Cb2)                                                                                     | $\beta$ -D-glucopyranosyl-(1-4)-D-<br>glucose                                                                                                                                                        |
| cellotriose (Cb3)                                                                                    | $\beta$ -D-glucopyranosyl-(1-4)- $\beta$ -D-<br>glucopyranosyl-(1-4)-D-glucose                                                                                                                       |
| cellotetraose (Cb4)                                                                                  | $\beta$ -D-glucopyranosyl-(1-4)- $\beta$ -D-<br>glucopyranosyl-(1-4)- $\beta$ -D-<br>glucopyranosyl-(1-4)-D-glucose                                                                                  |
| $\alpha$ -cyclodextrin ( $\alpha$ CD)                                                                | cyclohexaamylose                                                                                                                                                                                     |
| $\beta$ -cyclodextrin ( $\beta$ CD)                                                                  | cycloheptaamylose                                                                                                                                                                                    |
| $\gamma$ -cyclodextrin ( $\gamma$ CD)                                                                | cyclooctaamylose                                                                                                                                                                                     |
| dihydroxyacetone (DHA)                                                                               | -                                                                                                                                                                                                    |
| erlose (Erl)                                                                                         | $\alpha$ -D-glucopyranosyl-(1-4) $\alpha$ -D-<br>glucopyranosyl-(1-2)- $\beta$ -<br>fructofuranoside                                                                                                 |
| erythrose (Ery)                                                                                      | D-erythrose                                                                                                                                                                                          |
| fructose (Fru)                                                                                       | D-fructose                                                                                                                                                                                           |
| fucose (Fuc)                                                                                         | L-fucose                                                                                                                                                                                             |
| galactosamin (GalN)                                                                                  | 2-amino-2-deoxy-galactose                                                                                                                                                                            |
| galactose (Gal)                                                                                      | D-galactose                                                                                                                                                                                          |
| galacturonic acid (Gla)                                                                              | D-galacturonic acid                                                                                                                                                                                  |
| galactose-1phosphate (Gal1P)                                                                         | D-galactose-1phosphate                                                                                                                                                                               |
| gentianose (Gen)                                                                                     | $\beta$ -D-glucopyranosyl-(1-6)- $\alpha$ -D-                                                                                                                                                        |

|                                              |                                                                                                               |
|----------------------------------------------|---------------------------------------------------------------------------------------------------------------|
|                                              | glucopyranosyl-(1-2)-β-D-fructofuranoside                                                                     |
| gentiobiose (Geb)                            | β-D-glucopyranosyl-(1-6)-D-glucose                                                                            |
| β-glucan (Bgl)                               | -                                                                                                             |
| glucosamine (GlcN)                           | 2-amino-2-deoxy-glucose                                                                                       |
| glucose-1-phosphate (Glc1P)                  | D-glucose-1-phosphate                                                                                         |
| glucose-6-phosphate (Glc6P)                  | D-glucose-6-phosphate                                                                                         |
| glyceraldehyde hydrate (Gad <sub>hyd</sub> ) | DL-glyceraldehyde                                                                                             |
| gulose (Gul)                                 | L-gulose                                                                                                      |
| idose (Ido)                                  | L-idose                                                                                                       |
| inulin (Inu)                                 | -                                                                                                             |
| isomaltose (IM <sub>2</sub> )                | α-D-glucopyranosyl-(1-6)-D-glucose                                                                            |
| isomaltotriose (IM <sub>3</sub> )            | α-D-glucopyranosyl-(1-6)-α-D-glucopyranosyl-(1-6)-D-glucose                                                   |
| isomaltulose (Iml)                           | α-D-glucopyranosyl-(1-6)-D-fructose                                                                           |
| kestose (Kes)                                | α-D-glucopyranosyl-(1-2)-β-D-fructofuranosyl-(1-2)-β-D-fructofuranose                                         |
| kojibiose (Koj)                              | α-D-glucopyranosyl-(1-2)-D-glucose                                                                            |
| lactose (Lac)                                | β-D-galactopyranosyl-(1-4)-D-glucose                                                                          |
| lactulose (Lcu)                              | β-D-galactopyranosyl-(1-4)-D-fructose                                                                         |
| laminaribiose (Lam)                          | β-D-glucopyranosyl-(1-3)-D-glucose                                                                            |
| laminarin (Lmn)                              | -                                                                                                             |
| leucrose (Leu)                               | α-D-glucopyranosyl-(1-5)-D-fructopyranose                                                                     |
| lyxose (Lyx)                                 | D-lyxose                                                                                                      |
| maltose (M2)                                 | α-D-glucopyranosyl-(1-4)-D-glucose                                                                            |
| maltotriose (M3)                             | α-D-glucopyranosyl-(1-4)-α-D-glucopyranosyl-(1-4)-D-glucose                                                   |
| maltotetraose (M4)                           | α-D-glucopyranosyl-(1-4)-α-D-glucopyranosyl-(1-4)-α-D-glucopyranosyl-(1-4)-D-glucose                          |
| maltopentaose (M5)                           | α-D-glucopyranosyl-(1-4)-α-D-glucopyranosyl-(1-4)-α-D-glucopyranosyl-(1-4)-α-D-glucopyranosyl-(1-4)-D-glucose |

|                               |                                                                                                                                                                                                                      |
|-------------------------------|----------------------------------------------------------------------------------------------------------------------------------------------------------------------------------------------------------------------|
| maltohexaose (M6)             | $\alpha$ -D-Glucopyranosyl-(1-4)- $\alpha$ -D-glucopyranosyl-(1-4)-O- $\alpha$ -D-glucopyranosyl-(1-4)- $\alpha$ -D-glucopyranosyl-(1-4)- $\alpha$ -D-glucopyranosyl-(1-4)-D-glucose                                 |
| maltoheptaose (M7)            | $\alpha$ -D-Glucopyranosyl-(1-4)- $\alpha$ -D-glucopyranosyl-(1-4)- $\alpha$ -D-glucopyranosyl-(1-4)- $\alpha$ -D-glucopyranosyl-(1-4)- $\alpha$ -D-glucopyranosyl-(1-4)-D-glucose                                   |
| maltooctaose (M8)             | $\alpha$ -D-Glucopyranosyl-(1-4)- $\alpha$ -D-glucopyranosyl-(1-4)- $\alpha$ -D-glucopyranosyl-(1-4)- $\alpha$ -D-glucopyranosyl-(1-4)- $\alpha$ -D-glucopyranosyl-(1-4)- $\alpha$ -D-glucopyranosyl-(1-4)-D-glucose |
| maltulose (Mtu)               | $\alpha$ -D-glucopyranosyl-(1-4)-D-fructose                                                                                                                                                                          |
| mannose (Man)                 | -                                                                                                                                                                                                                    |
| melezitose (Mez)              | $\alpha$ -D-Glucopyranosyl-(1-3)- $\alpha$ -D-fructofuranosyl-(2-1)- $\alpha$ -D-glucopyranoside                                                                                                                     |
| melibiose (Mel)               | $\alpha$ -D-galactopyranosyl-(1-6)-D-glucose                                                                                                                                                                         |
| N-acetyl-glucosamine (GlcNAc) | 2-(acetylamino)-2-deoxy-D-glucose                                                                                                                                                                                    |
| N-acetyl-mannosamine (ManNAc) | 2-(acetylamino)-2-deoxy-D-mannose                                                                                                                                                                                    |
| N-acetyl-lactosamine (LacNAc) | $\beta$ -D-galactopyranosyl-(1-4)-2-acetamido-2-deoxy-D-glucose                                                                                                                                                      |
| neokestose (Nke)              | $\beta$ -D-fructofuranosyl-(2-6)- $\beta$ -D-glucopyranosyl-(1-2)- $\beta$ -D-fructofuranoside                                                                                                                       |
| nigerose (Nig)                | $\alpha$ -D-glucopyranosyl-(1-3)-D-glucose                                                                                                                                                                           |
| nystose (Nys)                 | $\alpha$ -D-glucopyranosyl-(1-2)- $\beta$ -D-fructofuranosyl-(1-2)- $\beta$ -D-fructofuranosyl-(1-2)- $\beta$ -D-fructofuranoside                                                                                    |
| panose (Pan)                  | $\alpha$ -D-glucopyranosyl-(1-6)- $\alpha$ -D-glucopyranosyl-(1-4)-D-glucose                                                                                                                                         |
| pullulan (Pul)                | -                                                                                                                                                                                                                    |

|                                                 |                                                                                                                                       |
|-------------------------------------------------|---------------------------------------------------------------------------------------------------------------------------------------|
| raffinose (Raf)                                 | $\alpha$ -D-galactopyranosyl-(1-6)- $\alpha$ -D-glucopyranosyl-(1-2)- $\beta$ -D-fructofuranoside                                     |
| rhamnose (Rha)                                  | L-rhamnose                                                                                                                            |
| ribose (Rib)                                    | D-ribose                                                                                                                              |
| rutinose (Rut)                                  | $\alpha$ -L-rhamnosyl-(1-6)-D-glucose                                                                                                 |
| sophorose (Sop)                                 | $\beta$ -D-glucopyranosyl-(1-2)-D-glucose                                                                                             |
| sorbose (Sor)                                   | D-sorbose                                                                                                                             |
| stachyose (Sta)                                 | $\alpha$ -D-galactopyranosyl-(1-6)- $\alpha$ -D-galactopyranosyl-(1-6)- $\alpha$ -D-glucopyranosyl-(1-2)- $\beta$ -D-fructofuranoside |
| sucrose (Suc)                                   | $\alpha$ -D-glucopyranosyl-(1-2)- $\beta$ -D-fructofuranoside                                                                         |
| tagatose (Tag)                                  | D-tagatose                                                                                                                            |
| talose (Tal)                                    | D-talose                                                                                                                              |
| threose (Thr)                                   | L-threose                                                                                                                             |
| $\alpha,\alpha$ -trehalose (Tre <sup>αα</sup> ) | $\alpha$ -D-glucopyranosyl-(1-1)- $\alpha$ -D-glucopyranoside                                                                         |
| $\alpha,\beta$ -trehalose (Tre <sup>αβ</sup> )  | $\alpha$ -D-glucopyranosyl-(1-1)- $\beta$ -D-glucopyranoside                                                                          |
| $\beta,\beta$ -trehalose (Tre <sup>ββ</sup> )   | $\beta$ -D-glucopyranosyl-(1-1)- $\beta$ -D-glucopyranoside                                                                           |
| turanose (Tur)                                  | $\alpha$ -D-glucopyranosyl-(1-3)- $\alpha$ -D-fructose                                                                                |
| xylose (Xyl)                                    | D-xylose                                                                                                                              |
| xylobiose (Xyl <sub>2</sub> )                   | $\beta$ -D-xylopyranosyl-(1-4)-D-xylose                                                                                               |
| xylotriose (Xyl <sub>3</sub> )                  | $\beta$ -D-xylopyranosyl-(1-4)- $\beta$ -D-xylopyranosyl-(1-4)-D-xylose                                                               |

---

**Figure S2**  $^{13}\text{C}$   $T_2$  measurement at 18.7 T magnetic field (800 MHz proton frequency) for isomatotriose  $\alpha(1-6)$  anomeric signals (reducing end shown in the bottom of the trisaccharide). Relaxation times were measured using  $^1\text{H}$ - $^{13}\text{C}$  correlation through INEPT transfers with sensitivity enhancement and with relaxation delays of 22.4 milliseconds multiplied by loops of 2, 6, 13 and 36, employing ‘chirp’ pulses for adiabatic inversion during relaxation delays. The resultant decay was fit with exponential decay curves in profit 6.2.9 (Quantumsoft, Zurich, CH).

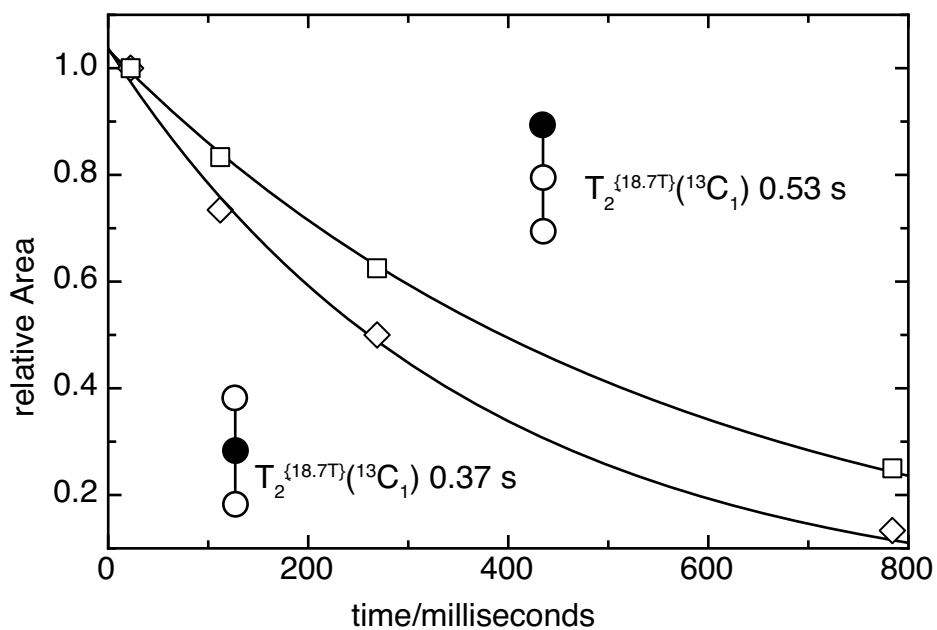

Supplement: c3an01922e.pdf [file c3an01922e.pdf]
