# Supplementary material for: Profiling of carbohydrate mixtures at unprecedented resolution using high-precision1H-13C chemical shift measurements and a reference library
Source: Royal Society of Chemistry journal article supplement (doi:10.1039/c3an01922e), 2013-11-11
Supplement: c3an01922e.xlsx [file c3an01922e.xlsx]

## Sheet: Sheet1
1. glucose (Glc)	13C	92.99	96.806
	1H	5.23	4.642
2. 2-deoxyglucose (2DG)	13C	92.208	94.302
	1H	5.378	4.932
3. 3-deoxyglucose (3DG)	13C	91.828	97.406	98.815	102.644
	1H	5.135	5.321	4.574	5.249
4. 63-a-glucosyl-maltotriose (63GM3)	13C	98.97	100.339	100.415	100.798
	1H	4.959	5.391	5.39	5.378
5. 63-a-maltosyl-maltotriose (63M2M3)	13C	98.834	100.75	100.964
	1H	4.958	5.38	5.363
6. 63-a-maltosyl-maltotetraose (63M2M4)	13C	99.479	100.812	100.911
	1H	4.976	5.335	5.35
7. allose (All)	13C	93.729	94.31
	1H	5.144	4.886
8. altrose (Alt)	13C	92.661	94.647	96.245	102.108
	1H	5.119	4.988	5.294	5.254
9. amylopectin (Amy)	13C	100.520 (100.470-100.635)		100.686
	1H	5.401 (5.395-5.406)		5.392
10. arabinose (Ara)	13C	93.464	96.062	97.655	101.989
	1H	5.236	5.301	4.514	5.246
11. cellobiose (Cb2)	13C	103.404	103.442
	1H	4.516	4.514
12. cellotriose (Cb3)	13C	103.197	103.227	103.442
	1H	4.543	4.541	4.515
13. cellotetraose (Cb4)	13C	103.207	103.221	103.235	103.443
	1H	4.541	4.539	4.54	4.515
14. a-cyclodextrin (aCD)	13C	102.248
	1H	5.06
15. b-cyclodextrin (bCD)	13C	102.683
	1H	5.075
16. g-cyclodextrin (gCD)	13C	102.497
	1H	5.117
17. dihydroxyacetone (DHA)	13C	65.787
	1H	4.414
18. erlose (Erl)	13C	92.831	100.69
	1H	5.414	5.399
19. erythrose (Ery)	13C	90.304	101.963
	1H	5.106	5.261
20. fructose (Fru)	13C	81.592	82.261	82.904
	1H	3.833	4.061	4.107
21. fucose (Fuc)	13C	93.121	97.142
	1H	5.199	4.549
22. galactosamin (GalN)	13C	90.578	95.042
	1H	5.46	4.804
23. galactose (Gal)	13C	93.185	97.362
	1H	5.265	4.582
24. galacturonic acid (Gla)	13C	93.066	96.926
	1H	5.289	4.567
25. galactose-1phosphate (Gal1P)	13C	94.791	94.819
	1H	5.503	5.494
26. gentianose (Gen)	13C	92.994
	1H	5.413
27. gentiobiose (Geb)	13C	103.554	103.581
	1H	4.494	4.512
28. b-glucan (Bgl)	13C	103.215	103.245	103.434
	1H	4.542	4.537	4.78
29. glucosamine (GlcN)	13C	90.652	94.97
	1H	5.419	4.832
30. glucose-1-phosphate (Glc1P)	13C	94.551	94.58
	1H	5.464	5.455
31. glucose-6-phosphate (Glc6P)	13C	93.11	96.974
	1H	5.226	4.643
32. glyceraldehyde hydrate (Gadhyd)	13C	90.728
	1H	4.951
33. gulose (Gul)	13C	93.724	94.724
	1H	5.18	4.878
34. idose (Ido)	13C	93.308	94.102	96.419	102.589
	1H	5.075	4.99	5.437	5.215
35. inulin (Inu)	13C	93.372
	1H	5.436
36. isomaltose (IM2)	13C	98.847	98.886
	1H	4.961	4.954
37. isomaltotriose (IM3)	13C	98.64	98.797	98.67	98.818
	1H	4.97	4.972	4.969	4.967
38. isomaltulose (Iml)	13C	99.186	99.395
	1H	4.977	4.964
39. kestose (Kes)	13C	93.378
	1H	5.429
40. kojibiose (Koj)	13C	90.367	97.11	97.278	98.603
	1H	5.439	4.798	5.098	5.383
41. lactose (Lac)	13C	92.726	96.653	103.808	103.84
	1H	5.23	4.672	4.459	4.458
42. lactulose (Lcu)	13C	101.749	103.74	104.129
	1H	4.565	4.473	4.454
43. laminaribiose (Lam)	13C	103.713	103.79
	1H	4.738	4.709
44. laminarin (Lmn)	13C	103.41
	1H	4.797
45. leucrose (Leu)	13C	101.204
	1H	5.116
46. lyxose (Lyx)	13C	94.959	95.094
	1H	5.007	4.866
47. maltose (M2)	13C	100.512	100.59
	1H	5.393	5.392
48. maltotriose (M3)	13C	100.359	100.438	100.683
	1H	5.39	5.39	5.39
49. maltotetraose (M4)	13C	100.532
	1H	5.38
50. maltopentaose (M5)	13C	100.513	100.533
	1H	5.388	5.387
51. maltohexaose (M6)	13C	100.503	100.513
	1H	5.391	5.387
52. maltoheptaose (M7)	13C	100.496	100.522
	1H	5.393	5.389
53. maltooctaose (M8)	13C	100.467	100.478	100.49
	1H	5.399	5.398	5.393
54. maltulose (Mtu)	13C	98.632	99.184	101.353
	1H	5.161	5.221	5.247
55. mannose (Man)	13C	94.569	94.936
	1H	4.894	5.18
56. melezitose (Mez)	13C	92.657
	1H	5.449
57. melibiose (Mel)	13C	93.078	96.958	99.099	99.14
	1H	5.242	4.67	4.991	4.985
58. N-acetyl-glucosamine (GlcNAc)	13C	91.748
	1H	5.203
59. N-acetyl-mannosamine (ManNAc)	13C	93.894	94.004
	1H	5.023	5.124
60. N-acetyl-lactosamine (LacNAc)	13C	91.449	95.756	103.795	103.838
	1H	5.212	4.737	4.48	4.485
61. neokestose (Nke)	13C	92.89
	1H	5.404
62. nigerose (Nig)	13C	99.916	99.98
	1H	5.35	5.363
63. nystose (Nys)	13C	93.396
	1H	5.435
64. panose (Pan)	13C	98.985	100.614	100.702
	1H	4.961	5.393	5.392
65. pullulan (Pul)	13C	98.851	100.69	101.153
	1H	4.961	5.394	5.336
66. raffinose (Raf)	13C	92.993	99.409
	1H	5.429	4.998
67. rhamnose (Rha)	13C	94.395	94.875
	1H	4.863	5.112
68. ribose (Rib)	13C	94.369	94.701	97.142	101.822
	1H	4.86	4.935	5.375	5.245
69. rutinose (Rut)	13C	92.975	101.475	101.715
	1H	5.221	4.829	4.821
70. sophorose (Sop)	13C	92.711
	1H	5.441
71. sorbose (Sor)	13C	76.283	76.302
	1H	4.407	4.406
72. stachyose (Sta)	13C	93.004	98.954	99.275
	1H	5.433	4.994	4.99
73. sucrose (Suc)	13C	93.051
	1H	5.414
74. tagatose (Tag)	13C	80.947	80.126	77.704
	1H	4.094	4.309	4.199
75. talose (Tal)	13C	95.021	95.508	97.382	101.817
	1H	4.811	5.278	5.366	5.24
76. threose (Thr)	13C	90.636	97.39	102.948
	1H	5.034	5.41	5.249
77. a,a-trehalose (Treaa)	13C	94.155
	1H	5.193
78. a,b-trehalose (Treab)	13C	101.034	103.763
	1H	5.242	4.649
79. b,b-trehalose (Trebb)	13C	100.062
	1H	4.819
80. turanose (Tur)	13C	97.717	99.269	101.779
	1H	5.208	5.305	5.3
81. xylose (Xyl)	13C	93.142	97.533
	1H	5.191	4.574
82. xylobiose (Xyl2)	13C	92.902	97.388	102.727	102.744
	1H	5.187	4.59	4.459	4.461
83. xylotriose (Xyl3)	13C	102.908	102.533	102.546	102.736
	1H	5.188	4.483	4.484	4.466
